# Supplementary material for: Real-time observation of ion exchange dynamics during surface treatment of all-inorganic perovskite quantum dots with Zn-halogenide complexes for color tuning and enhanced quantum efficiency
Source: Royal Society of Chemistry journal article supplement (doi:10.1039/d3ra02143b), 2023-01-01
Supplement: d3ra02143b1.pdf [file d3ra02143b1.pdf]

Supplementary information

# Real-Time Observation of Ion Exchange Dynamics during Surface Treatment of All-Inorganic Perovskite Quantum Dots with Zn-halogenide Complexes for Color Tuning and Enhanced Quantum Efficiency

Egle Ezerskyte<sup>1</sup>, Martynas Malikenas<sup>1</sup>, Simas Sakirzanovas<sup>1</sup>, Arturas Katelnikovas<sup>1</sup>, Vaidas Klimkevicius<sup>1\*</sup>

<sup>1</sup>Institute of Chemistry, Faculty of Chemistry and Geosciences, Vilnius University, Naugarduko 24, LT-03225 Vilnius, Lithuania

\*Correspondence: [vaidas.klimkevicius@chf.vu.lt](mailto:vaidas.klimkevicius@chf.vu.lt)

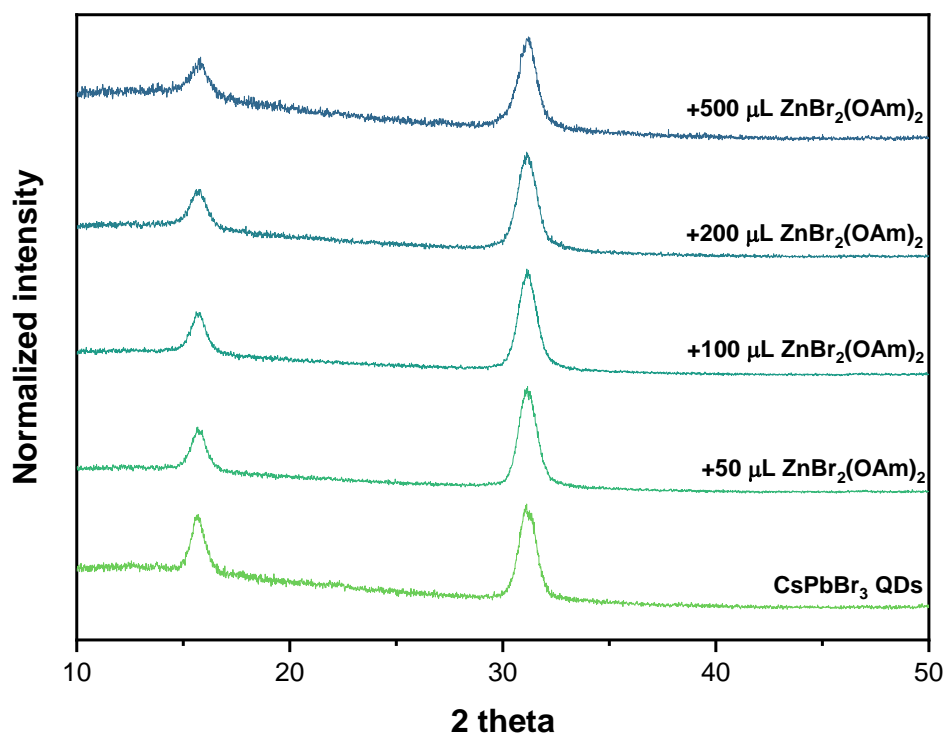

Figure S1. XRD patterns of stock CsPbBr<sub>3</sub> QDs and QDs modified with different amounts of ZnBr<sub>2</sub>(OAm)<sub>2</sub> complex solutions.

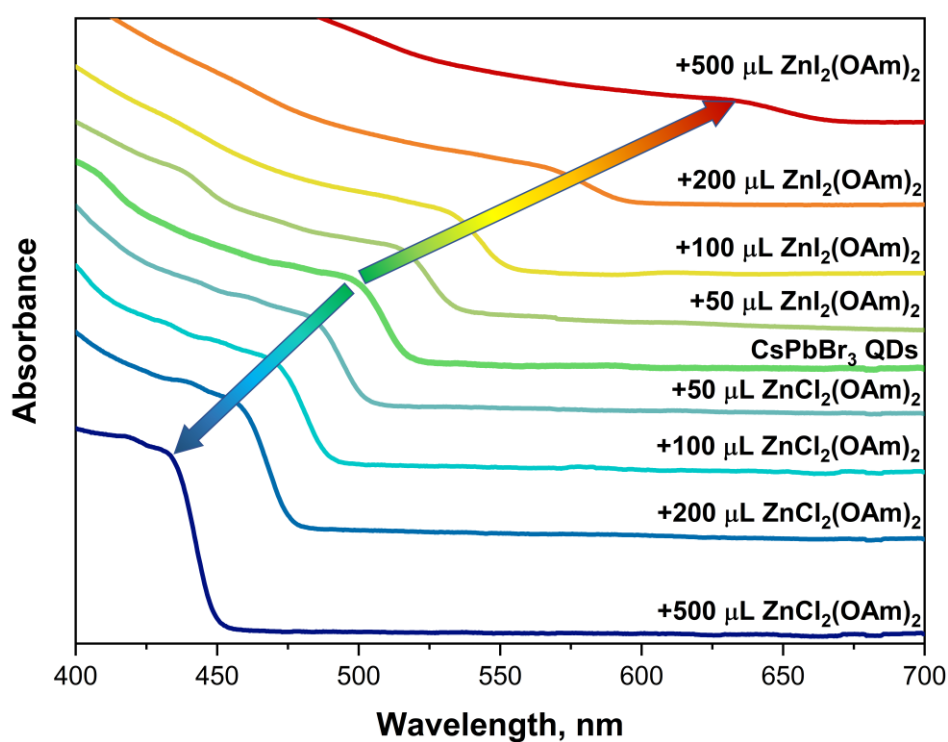

**Figure S2.** Absorption spectra of stock CsPbBr<sub>3</sub> and modified perovskites QDs employing the different amounts of ZnX<sub>2</sub>(OAm)<sub>2</sub> complex solutions (X = Cl, I).

15  
16  
17

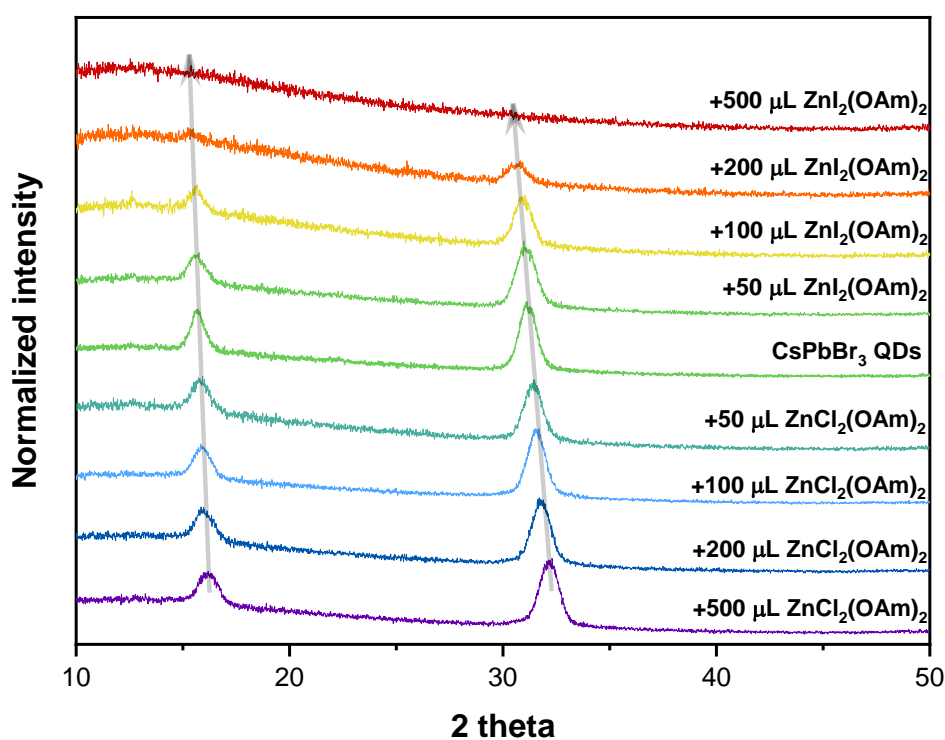

**Figure S3.** XRD patterns of stock CsPbBr<sub>3</sub> QDs and QDs modified with different amounts of ZnX<sub>2</sub>(OAm)<sub>2</sub> complex solutions (X = Cl, I).

18  
19
